# Supplementary material for: Aquila_stLFR: diploid genome assembly based structural variant calling package for stLFR linked-reads
Source: PubMed Central journal article supplement (PMC9710574; doi:10.1093/bioadv/vbab007), 2021-06-16
Supplement: vbab007_supplementary_data.pdf [file vbab007_supplementary_data.pdf]

# Aquila\_stLFR: diploid genome assembly based structural variant calling package for stLFR linked-reads

## Supplemental Material

### Hybrid assembly of stLFR and 10X linked-reads and SV detection from the hybrid mode of Aquila\_stLFR

We calculated the parameters of the stLFR library as follows:  $C = 48$ ,  $C_R = 0.2X$ ,  $C_F = 237.6X$ ,  $\mu_{FL} = 30.1kb$  (Supplementary Table 2).  $C$  represents raw coverage,  $C_R$  represents average coverage of short reads per fragment,  $C_F$  represents the average physical coverage of the genome by long DNA fragments, and  $\mu_{FL}$  represents mean unweighted DNA fragment length. By comparing the stLFR library parameters with those of the 10X ones in Supplementary Table 2 ( $C = 93$ ,  $C_R = 0.12X$ ,  $C_F = 760.0X$ ,  $\mu_{FL} = 44.8kb$ ), low  $\mu_{FL}$  and raw coverage  $C$  from stLFR could be responsible for the lower contiguity of stLFR assemblies (N50 22.4kb for stLFR vs. N50 96.4kb for 10X linked-reads in Supplementary Table 2). Our recent studies (Zhang et al., 2019, 2020) also suggest that the optimal raw coverage of 10X linked-reads for diploid assembly and SV detection from assemblies is at least 56X and the quality of diploid assembly benefits from longer average fragment length. Furthermore, the stLFR library used a shorter, 100bp length of paired short reads, which was a disadvantage for local assembly compared to the 150bp length of paired short reads used by 10x linked-reads sequencing.

To increase the raw coverage  $C$  and  $\mu_{FL}$ , we used the hybrid mode in Aquila\_stLFR to assemble both stLFR and 10X linked-reads (GiAB NA24385 stLFR library + NA24385 10X linked-reads library 5 in Zhou et al., 2021). Both raw coverage  $C$  and  $C_F$  increased almost linearly by the combination of the stLFR and 10X libraries (Supplementary Table 2). Mean fragment length  $\mu_{FL}$  also increased compared to the stLFR library. Hybrid assembly further improved the continuity of diploid contigs (N50) compared to both stLFR and 10X linked-reads libraries (Supplementary Table 2), and the improvement was more significant for the stLFR library. We also saw that for SV detection, the F1 score of the hybrid mode increased by 12.4%, 23.3%, and 27.7% respectively for three different sizes of deletions compared to the stLFR library (Supplementary Table 3), and 20.7% and 4.78% for two different sizes of insertions (Supplementary Table 4). Compared to the 10X library, the hybrid mode increased 1.7%, 0.1% and 4.3% respectively for three different sizes of deletions (Supplementary Table 3), and 0.8% and 0.5% for two different sizes of insertions (Supplementary Table 4). The hybrid mode could further remove more false positive SVs to improve the overall performance for 10X linked-reads. In conclusion, the hybrid mode outperformed both stLFR and 10X linked-reads libraries, and the improvement was most significant for stLFR linked-reads by increasing both recall and precision. The overall F1 score also improved by filtering more false positives relative to 10X linked-reads.

Our study provides a guideline for future stLFR library preparation to achieve significant improvement in diploid assembly and SV detection.

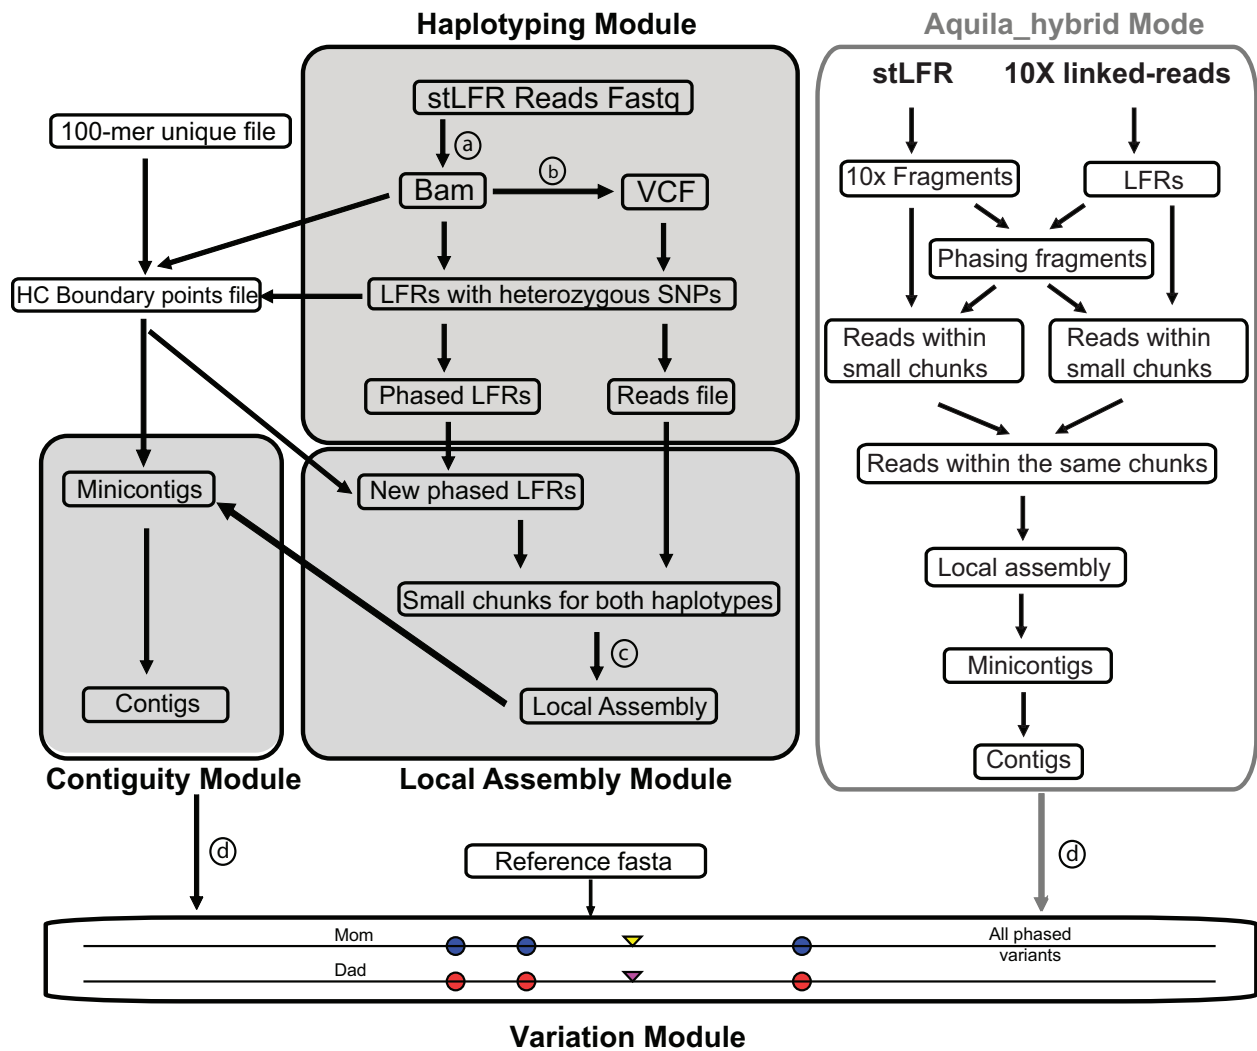

Supplemental Figure 1: Pipeline of Aquila\_stLFR, a reference-assisted diploid-resolved genome assembly for stLFR. Input files: FASTQ file, BAM file and VCF file. a: Bwa-mem; b: FreeBayes; c: SPAdes; d: minimap2 and pafutils.



| insertion |                | Aquila_stLFR |
|-----------|----------------|--------------|
| 50-1k     | Benchmark      |              |
|           | Total call     | 1,311        |
|           | True Positive  | 1,099        |
|           | False Positive | 212          |
|           | False Negative | 3,591        |
|           | Precision      | 83.8%        |
|           | Recall         | 23.4%        |
| 1k-10k    | Benchmark      |              |
|           | Total call     | 6            |
|           | True Positive  | 2            |
|           | False Positive | 4            |
|           | False Negative | 726          |
|           | Precision      | 33.3%        |
|           | Recall         | 0.27%        |

Supplemental Table 1: Genome-wide insertion evaluation for GiAB NA24385 stLFR library against GIAB NA24385 benchmark.

| Source                          | Raw Coverage<br>$C(X)$ | $C_F$<br>( $X$ ) | $C_R$<br>( $X$ ) | $\mu_{FL}$<br>( $kb$ ) | Contig N50( $kb$ ) | Contig NA50( $kb$ ) | Diploid Ratio |
|---------------------------------|------------------------|------------------|------------------|------------------------|--------------------|---------------------|---------------|
| GiAB (stLFR)                    | 48                     | 238              | 0.20             | 30.1                   | 23.3               | 22.4                | 2.03          |
| L5 from Zhou et al., 2021 (10X) | 93                     | 760              | 0.12             | 44.8                   | 98.4               | 96.4                | 2.04          |
| Hybrid library (stLFR +10X)     | 134                    | 959              | 0.14             | 41.9                   | 100.4              | 100.3               | 2.06          |

Supplemental Table 2: Parameters of stLFR, 10X linked-reads library, and the hybrid library for sample NA24385.  $C_F$ : physical (fragment) coverage;  $C_R$ : read coverage per fragment;  $C$ : raw coverage  $C \geq C_F * C_R$ ,  $\mu_{FL}$ : mean fragment length. All four parameters for three libraries were generated through their hg19 BAM files. Assembly metrics of contig N50/NA50 and diploid fraction were generated by Quast (Gurevich et al., 2013). Diploid ratio is the total number of aligned bases in the NA24385 assembly divided by the total number of aligned bases in the hg19 reference genome.

| Deletion |                | Aquila_stLFR<br>(stLFR) | Aquila<br>(10X) | Aquila<br>(stLFR + 10X) |
|----------|----------------|-------------------------|-----------------|-------------------------|
| 50-1k    | Benchmark      | 3671                    |                 |                         |
|          | Total call     | 11,495                  | 9,804           | 9,226                   |
|          | True Positive  | 2,954                   | 3,349           | 3,317                   |
|          | False Positive | 8,541                   | 6,455           | 5,909                   |
|          | False Negative | 717                     | 322             | 354                     |
|          | Precision      | 25.7%                   | 34.2%           | 36.0%                   |
|          | Recall         | 80.5%                   | 91.2%           | 90.4%                   |
|          | <b>F1</b>      | <b>39.0%</b>            | <b>49.7%</b>    | <b>51.4%</b>            |
| 1k-10k   | Benchmark      | 499                     |                 |                         |
|          | Total call     | 602                     | 452             | 445                     |
|          | True Positive  | 317                     | 384             | 382                     |
|          | False Positive | 285                     | 68              | 63                      |
|          | False Negative | 182                     | 115             | 117                     |
|          | Precision      | 52.7%                   | 85.0%           | 85.8%                   |
|          | Recall         | 63.5%                   | 77.0%           | 76.6%                   |
|          | <b>F1</b>      | <b>57.6%</b>            | <b>80.8%</b>    | <b>80.9%</b>            |
| >10k     | Benchmark      | 29                      |                 |                         |
|          | Total call     | 105                     | 45              | 31                      |
|          | True Positive  | 6                       | 12              | 11                      |
|          | False Positive | 99                      | 33              | 20                      |
|          | False Negative | 23                      | 17              | 18                      |
|          | Precision      | 5.7%                    | 26.7%           | 35.5%                   |
|          | Recall         | 20.7%                   | 41.4%           | 37.9%                   |
|          | <b>F1</b>      | <b>9.0%</b>             | <b>32.4%</b>    | <b>36.7%</b>            |

Supplemental Table 3: Genome-wide deletion evaluation for the NA24385 stLFR library, NA24385 10X linked-reads library 5 (L5) from Zhou et al., 2021, and the hybrid library (stLFR + 10X linked-reads libraries) against GIAB NA24385 benchmark.

| Insertion |                | Aquila_stLFR<br>(stLFR) | Aquila<br>(10X) | Aquila<br>(stLFR + 10X) |
|-----------|----------------|-------------------------|-----------------|-------------------------|
| 50-1k     | Benchmark      | 4690                    |                 |                         |
|           | Total call     | 1,311                   | 4,012           | 3,549                   |
|           | True Positive  | 1,099                   | 2,457           | 2,359                   |
|           | False Positive | 212                     | 1,555           | 1,190                   |
|           | False Negative | 3,591                   | 2,233           | 2,331                   |
|           | Precision      | 83.8%                   | 61.2%           | 66.5%                   |
|           | Recall         | 23.4%                   | 52.4%           | 50.3%                   |
|           | <b>F1</b>      | <b>36.6%</b>            | <b>56.5%</b>    | <b>57.3%</b>            |
| 1k-10k    | Benchmark      | 728                     |                 |                         |
|           | Total call     | 6                       | 21              | 24                      |
|           | True Positive  | 2                       | 18              | 20                      |
|           | False Positive | 4                       | 3               | 4                       |
|           | False Negative | 726                     | 710             | 708                     |
|           | Precision      | 33.3%                   | 85.7%           | 83.3%                   |
|           | Recall         | 0.27%                   | 2.47%           | 2.75%                   |
|           | <b>F1</b>      | <b>0.54%</b>            | <b>4.81%</b>    | <b>5.32%</b>            |

Supplemental Table 4: Genome-wide insertion evaluation for the NA24385 stLFR library, NA24385 10X linked-reads library 5 (L5) from Zhou et al., 2021, and the hybrid library (stLFR + 10X linked-reads libraries) against GIAB NA24385 benchmark.

## References

- Gurevich A, Saveliev V, Vyahhi N, Tesler G (2013) QUASt: quality assessment tool for genome assemblies. *Bioinformatics* 29:1072–1075 <http://www.ncbi.nlm.nih.gov/pubmed/23422339>.
- Zhang L, Zhou X, Weng Z, Sidow A (2019) Assessment of human diploid genome assembly with 10x Linked-Reads data. *Gigascience* 8:1–11.
- Zhang L, Zhou X, Weng Z, Sidow A (2020) De novo diploid genome assembly for genome-wide structural variant detection. *NAR Genomics Bioinforma* 2:1–10.
- Zhou X, Zhang L, Weng Z, Dill DL, Sidow A (2021) Aquila enables reference-assisted diploid personal genome assembly and comprehensive variant detection based on linked reads. *Nat Commun* 12 <http://dx.doi.org/10.1038/s41467-021-21395-x>.
